# Supplementary material
Source: MDPI journal article supplement (https://www.mdpi.com/2073-4352/10/12/1137)
Supplement: s1 [file s1]

Supplementary Materials

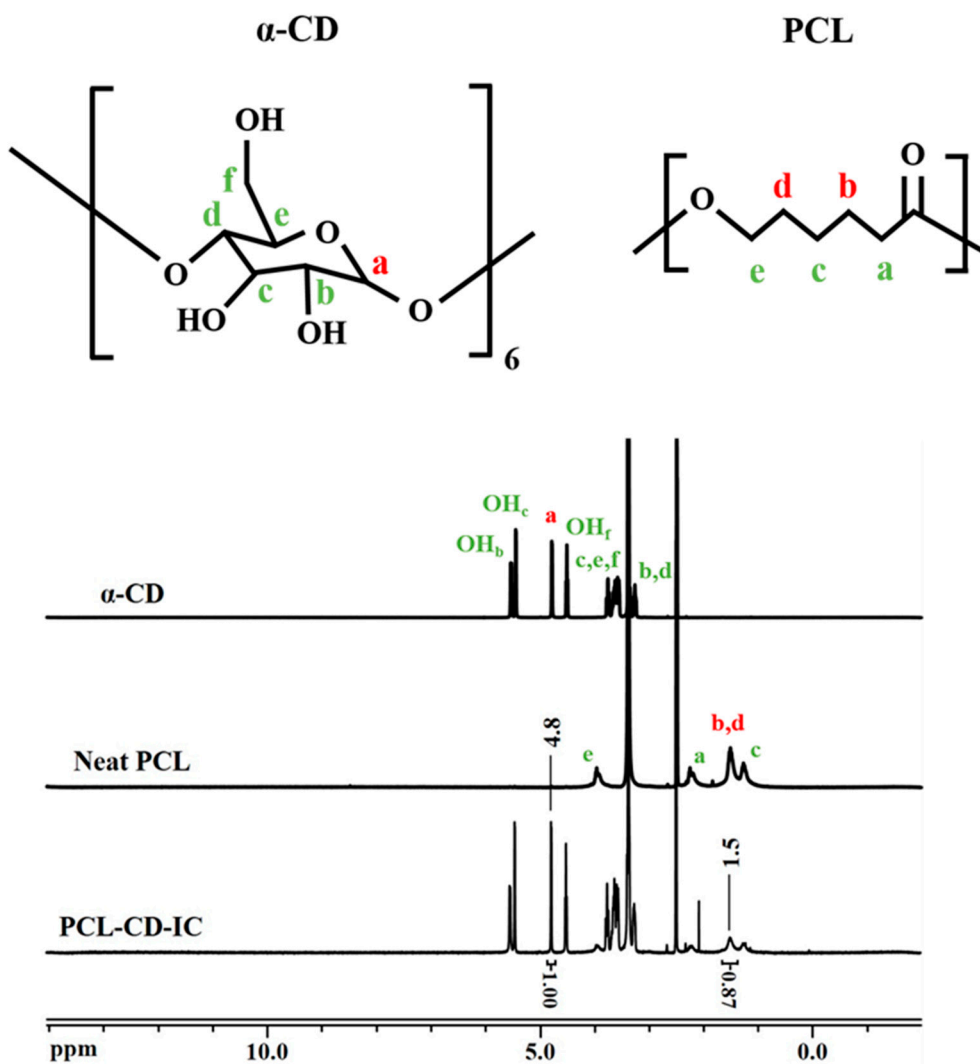

Figure S1.  $^1\text{H}$  NMR spectra of  $\alpha$ -CD, neat PCL and PCL-CD-IC.

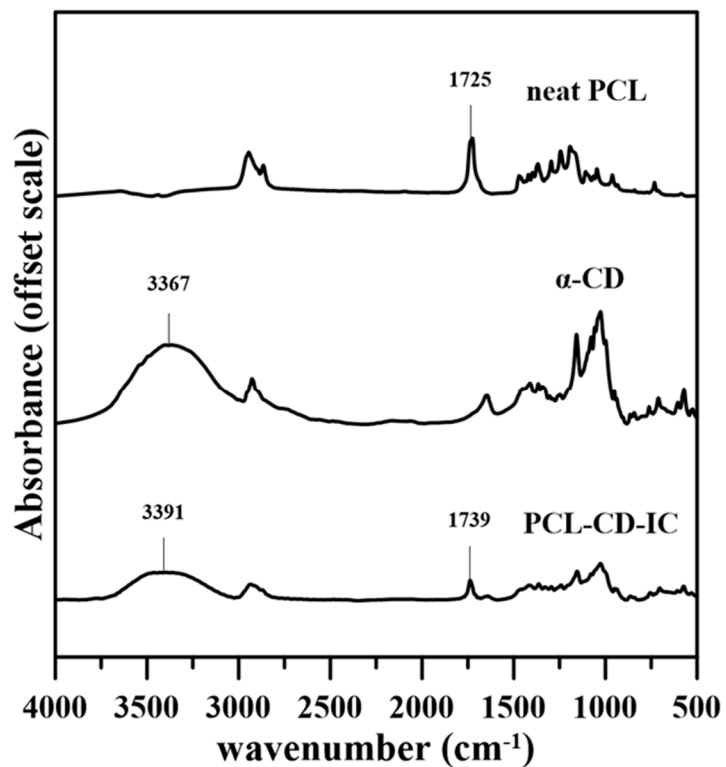

Figure S2. FTIR spectra of neat PCL,  $\alpha$ -CD and PCL-CD-IC.

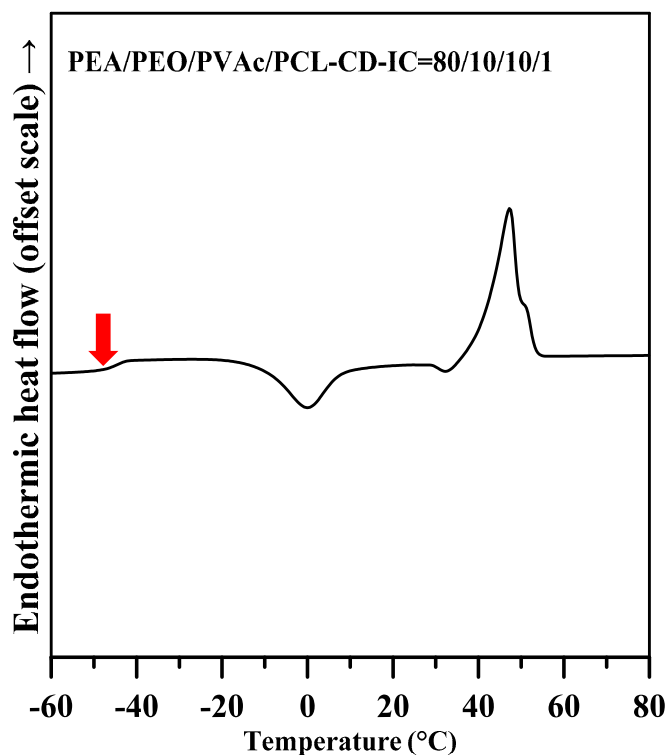

Figure S3. DSC thermal scan of PEA/PEO/PVAc/PCL-CD-IC=80/10/10/1 composite. The arrow indicates the single  $T_g$  of the composite, demonstrating the miscibility of the composite.

#### The analysis method of isothermal crystallization using the Avrami equation

The isothermal crystallization results from neat PEA to quaternary PEA/PEO/PVAc/PCL-CD-IC composites were analyzed by the Avrami equation [1,2] showing below:

$$1 - X_t = \exp(-kt^n) \quad (1)$$

In equation (1),  $X_t$  is relative crystallinity at a given time  $t$ ,  $k$  is the crystallization rate constant, and  $n$  is the Avrami exponent. The relevant kinetic parameters can be evaluated through the logarithmic form of the Avrami equation, such as equation (2):

$$\log[-\ln(1 - X_t)] = \log k + n \log t \quad (2)$$

Equation (2) shows that when  $\log[-\ln(1-X_t)]$  has a linear relationship with  $\log(t)$ ,  $k$  and  $n$  are the slope and intercept of the plot, respectively. Furthermore, the crystallization half-time ( $t_{0.5}$ ) can be obtained by equation (3):

$$t_{0.5} = \left(\frac{\ln 2}{k}\right)^{\frac{1}{n}} \quad (3)$$

It should be noted that  $t_{0.5}$  can be defined as the time when the crystallization proceeds to 50%. In general, the crystallization rate is related to the reciprocal of  $t_{0.5}$ . When the crystallization rate is higher,  $1/t_{0.5}$  is larger.

## References

1. Avrami, M. Kinetics of phase change. II transformation-time relations for random distribution of nuclei. *J. Chem. Phys.* **1940**, *8*, 212–224.
2. Avrami, M. Granulation, phase change, and microstructure kinetics of phase change. III. *J. Chem. Phys.* **1941**, *9*, 177–184.
